# Supplementary material
Source: PubMed Central journal article supplement (PMC2741404)
Supplement: NIHMS86875-supplement-supplement_1.pdf [file NIHMS86875-supplement-supplement_1.pdf]

**Supplemental Table 1. Risk of colon cancer according to baseline quintiles of one-carbon nutrient intake by micro satellite instability (MSI) status of tumor among 47,371 men and 88,691 women (NHS and HPFS separately and combined).**

| Energy-adjusted daily one-carbon nutrient intake | RR (95% CI)*                                |                  |                  |                  |                  | P <sub>trend</sub> |
|--------------------------------------------------|---------------------------------------------|------------------|------------------|------------------|------------------|--------------------|
|                                                  | Q1                                          | Q2               | Q3               | Q4               | Q5               |                    |
| <b>Folate (µg)</b>                               |                                             |                  |                  |                  |                  |                    |
|                                                  | <b>Nurses' Health Study</b>                 |                  |                  |                  |                  |                    |
| <b>Folate, range (µg)</b>                        | <b>≤190</b>                                 | <b>191-245</b>   | <b>246-318</b>   | <b>319-549</b>   | <b>≥550</b>      |                    |
| Cases / Person-years                             | 89/373965                                   | 91/373326        | 68/372686        | 68/373129        | 73/368818        |                    |
| All cancers <sup>‡</sup>                         | 1.0                                         | 0.94 (0.70-1.26) | 0.66 (0.48-0.90) | 0.65 (0.48-0.90) | 0.71 (0.52-0.97) | 0.09               |
| All cancers <sup>*</sup>                         | 1.0                                         | 0.97 (0.72-1.30) | 0.70 (0.51-0.96) | 0.71 (0.51-0.98) | 0.80 (0.58-1.10) | 0.34               |
| Cases / Person-years                             | 72/373978                                   | 74/373343        | 52/372697        | 56/373142        | 56/368838        |                    |
| MSI-low/MSS <sup>‡</sup>                         | 1.0                                         | 1.06 (0.77-1.47) | 0.62 (0.44-0.89) | 0.67 (0.47-0.95) | 0.68 (0.48-0.96) | 0.05               |
| MSI-low/MSS <sup>*</sup>                         | 1.0                                         | 1.03 (0.74-1.43) | 0.66 (0.46-0.95) | 0.72 (0.51-1.03) | 0.76 (0.53-1.09) | 0.18               |
| Cases / Person-years                             | 17/374027                                   | 17/37385         | 16/372727        | 12/373176        | 17/368862        |                    |
| MSI-high <sup>‡</sup>                            | 1.0                                         | 0.92 (0.47-1.79) | 0.81 (0.41-1.60) | 0.60 (0.29-1.26) | 0.87 (0.44-1.70) | 0.86               |
| MSI-high <sup>*</sup>                            | 1.0                                         | 0.94 (0.48-1.85) | 0.86 (0.43-1.70) | 0.65 (0.31-1.37) | 0.97 (0.49-1.92) | 0.62               |
|                                                  | <b>Health Professionals Follow-up Study</b> |                  |                  |                  |                  |                    |
| <b>Folate, range (µg)</b>                        | <b>≤284</b>                                 | <b>285-351</b>   | <b>352-437</b>   | <b>438-661</b>   | <b>≥662</b>      |                    |
| Cases / Person-years                             | 59/148506                                   | 56/147823        | 53/147593        | 55/147610        | 54/145950        |                    |
| All cancers <sup>‡</sup>                         | 1.0                                         | 0.87 (0.60-1.25) | 0.79 (0.54-1.14) | 0.81 (0.56-1.17) | 0.76 (0.52-1.10) | 0.06               |
| All cancers <sup>*</sup>                         | 1.0                                         | 0.87 (0.60-1.25) | 0.81 (0.56-1.18) | 0.86 (0.59-1.25) | 0.80 (0.54-1.19) | 0.14               |
| Cases / Person-years                             | 45/148506                                   | 48/147823        | 46/147593        | 49/147610        | 50/145950        |                    |
| MSI-low/MSS <sup>‡</sup>                         | 1.0                                         | 1.03 (0.68-1.54) | 0.89 (0.59-1.35) | 0.95 (0.63-1.42) | 0.92 (0.61-1.38) | 0.18               |
| MSI-low/MSS <sup>*</sup>                         | 1.0                                         | 1.03 (0.68-1.55) | 0.93 (0.61-1.40) | 1.00 (0.66-1.52) | 0.98 (0.64-1.50) | 0.26               |
| Cases / Person-years                             | 14/148506                                   | 8/147823         | 7/147593         | 6/147610         | 4/145950         |                    |
| MSI-high <sup>‡</sup>                            | 1.0                                         | 0.52 (0.22-1.24) | 0.44 (0.18-1.08) | 0.37 (0.14-0.97) | 0.24 (0.08-0.72) | 0.13               |
| MSI-high <sup>*</sup>                            | 1.0                                         | 0.52 (0.22-1.24) | 0.45 (0.18-1.11) | 0.39 (0.15-1.02) | 0.25 (0.08-0.76) | 0.22               |
|                                                  | <b>Both Cohorts Combined</b>                |                  |                  |                  |                  |                    |
| Cases / Person-years                             | 148/515784                                  | 147/514680       | 121/513801       | 123/514473       | 127/508147       |                    |

|                          |            |                  |                  |                  |                  |      |
|--------------------------|------------|------------------|------------------|------------------|------------------|------|
| All cancers <sup>‡</sup> | 1.0        | 0.91 (0.72-1.14) | 0.71 (0.56-0.90) | 0.71 (0.56-0.91) | 0.73 (0.58-0.93) | 0.03 |
| All cancers <sup>*</sup> | 1.0        | 0.92 (0.73-1.16) | 0.74 (0.58-0.94) | 0.77 (0.60-0.98) | 0.80 (0.62-1.03) | 0.09 |
| Cases / Person-years     | 117/515809 | 122/514707       | 98/513818        | 105/514492       | 106/508170       |      |
| MSI-low/MSS <sup>‡</sup> | 1.0        | 1.05 (0.81-1.35) | 0.72 (0.55-0.95) | 0.77 (0.59-1.01) | 0.77 (0.59-1.00) | 0.06 |
| MSI-low/MSS <sup>*</sup> | 1.0        | 1.03 (0.80-1.33) | 0.76 (0.58-0.99) | 0.83 (0.63-1.08) | 0.84 (0.64-1.11) | 0.13 |
| Cases / Person-years     | 31/515889  | 25/514780        | 23/513884        | 18/514570        | 21/508234        |      |
| MSI-high <sup>‡</sup>    | 1.0        | 0.71 (0.44-1.25) | 0.64 (0.37-1.10) | 0.50 (0.28-0.89) | 0.58 (0.33-1.00) | 0.36 |
| MSI-high <sup>*</sup>    | 1.0        | 0.75 (0.44-1.27) | 0.69 (0.39-1.15) | 0.53 (0.30-0.96) | 0.63 (0.36-1.10) | 0.45 |

| <b>Methionine (g)</b>                       | <b>Q1</b>    | <b>Q2</b>        | <b>Q3</b>        | <b>Q4</b>        | <b>Q5</b>        |      |
|---------------------------------------------|--------------|------------------|------------------|------------------|------------------|------|
| <b>Nurses' Health Study</b>                 |              |                  |                  |                  |                  |      |
| <b>Methionine, range (g)</b>                | <b>≤1.50</b> | <b>1.51-1.70</b> | <b>1.71-1.90</b> | <b>1.91-2.20</b> | <b>≥2.21</b>     |      |
| Cases / Person-years                        | 82/371361    | 91/371700        | 65/375393        | 63/372420        | 88/371050        |      |
| All cancers <sup>‡</sup>                    | 1.0          | 1.10 (0.81-1.48) | 0.76 (0.55-1.05) | 0.72 (0.52-1.00) | 0.95 (0.70-1.28) | 0.71 |
| All cancers <sup>*</sup>                    | 1.0          | 1.08 (0.80-1.46) | 0.73 (0.52-1.02) | 0.70 (0.50-0.98) | 0.92 (0.68-1.26) | 0.68 |
| Cases / Person-years                        | 64/371378    | 74/371717        | 56/375400        | 45/372437        | 71/371066        |      |
| MSI-low/MSS <sup>‡</sup>                    | 1.0          | 0.88 (0.63-1.23) | 0.83 (0.58-1.19) | 0.66 (0.45-0.97) | 0.98 (0.70-1.37) | 0.60 |
| MSI-low/MSS <sup>*</sup>                    | 1.0          | 0.89 (0.64-1.25) | 0.81 (0.56-1.16) | 0.64 (0.43-0.94) | 0.96 (0.68-1.35) | 0.32 |
| Cases / Person-years                        | 18/371415    | 17/371764        | 9/375440         | 18/372455        | 17/371103        |      |
| MSI-high <sup>‡</sup>                       | 1.0          | 0.93 (0.48-1.81) | 0.48 (0.21-1.06) | 0.94 (0.49-1.80) | 0.83 (0.43-1.61) | 0.81 |
| MSI-high <sup>*</sup>                       | 1.0          | 0.92 (0.47-1.78) | 0.46 (0.21-1.03) | 0.91 (0.47-1.75) | 0.82 (0.42-1.59) | 0.05 |
| <b>Health Professionals Follow-up Study</b> |              |                  |                  |                  |                  |      |
| <b>Methionine, range (g)</b>                | <b>≤1.81</b> | <b>1.82-2.04</b> | <b>2.05-2.26</b> | <b>2.27-2.54</b> | <b>≥2.55</b>     |      |
| Cases / Person-years                        | 66/146799    | 56/147801        | 43/149252        | 70/147413        | 42/146217        |      |
| All cancers <sup>‡</sup>                    | 1.0          | 0.86 (0.60-1.22) | 0.65 (0.44-0.96) | 1.05 (0.75-1.47) | 0.59 (0.40-0.87) | 0.03 |
| All cancers <sup>*</sup>                    | 1.0          | 0.83 (0.58-1.18) | 0.62 (0.42-0.92) | 1.02 (0.72-1.43) | 0.60 (0.40-0.89) | 0.04 |
| Cases / Person-years                        | 56/146799    | 52/147801        | 31/149252        | 65/147413        | 34/146217        |      |
| MSI-low/MSS <sup>‡</sup>                    | 1.0          | 1.07 (0.73-1.56) | 0.55 (0.36-0.86) | 1.14 (0.80-1.64) | 0.56 (0.37-0.86) | 0.03 |
| MSI-low/MSS <sup>*</sup>                    | 1.0          | 1.11 (0.76-1.62) | 0.53 (0.34-0.82) | 1.11 (0.77-1.60) | 0.57 (0.37-0.88) | 0.04 |
| Cases / Person-years                        | 10/146799    | 4/147801         | 12/149252        | 5/147413         | 8/146217         |      |
| MSI-high <sup>‡</sup>                       | 1.0          | 0.41 (0.13-1.29) | 1.20 (0.52-2.78) | 0.50 (0.17-1.45) | 0.75 (0.30-1.90) | 0.60 |

|                              |            |                  |                  |                  |                  |      |
|------------------------------|------------|------------------|------------------|------------------|------------------|------|
| MSI-high*                    | 1.0        | 0.39 (0.12-1.29) | 1.15 (0.50-2.66) | 0.48 (0.16-1.41) | 0.76 (0.30-1.93) | 0.62 |
| <b>Both Cohorts Combined</b> |            |                  |                  |                  |                  |      |
| Cases / Person-years         | 148/511849 | 147/513305       | 108/518361       | 133/513171       | 130/510198       |      |
| All cancers <sup>‡</sup>     | 1.0        | 0.99 (0.79-1.24) | 0.71 (0.55-0.91) | 0.86 (0.68-1.09) | 0.79 (0.62-1.00) | 0.30 |
| All cancers*                 | 1.0        | 0.97 (0.77-1.22) | 0.69 (0.54-0.89) | 0.84 (0.66-1.07) | 0.79 (0.62-1.00) | 0.11 |
| Cases / Person-years         | 120/511878 | 126/513325       | 87/518378        | 110/513192       | 105/510222       |      |
| MSI-low/MSS <sup>‡</sup>     | 1.0        | 0.96 (0.74-1.23) | 0.71 (0.54-0.93) | 0.88 (0.68-1.14) | 0.79 (0.60-1.02) | 0.36 |
| MSI-low/MSS*                 | 1.0        | 0.98 (0.75-1.26) | 0.69 (0.52-0.91) | 0.86 (0.66-1.12) | 0.78 (0.60-1.02) | 0.15 |
| Cases / Person-years         | 28/511955  | 21/513419        | 21/518431        | 23/513266        | 25/510285        |      |
| MSI-high <sup>‡</sup>        | 1.0        | 0.75 (0.42-1.32) | 0.73 (0.41-1.28) | 0.79 (0.45-1.37) | 0.80 (0.47-1.38) | 0.62 |
| MSI-high*                    | 1.0        | 0.73 (0.42-1.29) | 0.71 (0.40-1.25) | 0.77 (0.44-1.34) | 0.80 (0.47-1.38) | 0.44 |

| <b>Vitamin B<sub>6</sub> (mg)</b>           | <b>Q1</b>    | <b>Q2</b>        | <b>Q3</b>        | <b>Q4</b>        | <b>Q5</b>        | <b>P Trend</b> |
|---------------------------------------------|--------------|------------------|------------------|------------------|------------------|----------------|
| <b>Nurses' Health Study</b>                 |              |                  |                  |                  |                  |                |
| <b>Vitamin B<sub>6</sub>, range (mg)</b>    | <b>≤1.30</b> | <b>1.31-1.60</b> | <b>1.61-2.00</b> | <b>2.01-3.50</b> | <b>≥3.51</b>     |                |
| Cases / Person-years                        | 93/375527    | 77/372932        | 72/374307        | 66/371265        | 81/367893        |                |
| All cancers <sup>‡</sup>                    | 1.0          | 0.77 (0.57-1.04) | 0.65 (0.48-0.89) | 0.62 (0.45-0.85) | 0.74 (0.55-1.00) | 0.50           |
| All cancers*                                | 1.0          | 0.77 (0.57-1.04) | 0.67 (0.49-0.92) | 0.66 (0.48-0.91) | 0.82 (0.60-1.13) | 0.33           |
| Cases / Person-years                        | 73/375547    | 65/372939        | 58/374321        | 55/371275        | 59/367917        |                |
| MSI-low/MSS <sup>‡</sup>                    | 1.0          | 1.21 (0.87-1.69) | 0.67 (0.47-0.95) | 0.66 (0.46-0.93) | 0.69 (0.49-0.97) | 0.77           |
| MSI-low/MSS*                                | 1.0          | 1.21 (0.86-1.69) | 0.69 (0.49-0.98) | 0.70 (0.49-1.00) | 0.76 (0.53-1.09) | 0.58           |
| Cases / Person-years                        | 20/375590    | 12/372979        | 14/374359        | 11/371309        | 22/367940        |                |
| MSI-high <sup>‡</sup>                       | 1.0          | 0.56 (0.27-1.14) | 0.61 (0.31-1.20) | 0.51 (0.24-1.07) | 1.04 (0.56-1.92) | 0.41           |
| MSI-high*                                   | 1.0          | 0.56 (0.27-1.14) | 0.59 (0.30-1.17) | 0.48 (0.23-1.00) | 0.93 (0.51-1.71) | 0.34           |
| <b>Health Professionals Follow-up Study</b> |              |                  |                  |                  |                  |                |
| <b>Vitamin B<sub>6</sub>, range (mg)</b>    | <b>≤1.90</b> | <b>1.91-2.30</b> | <b>2.31-3.10</b> | <b>3.11-5.80</b> | <b>≥5.81</b>     |                |
| Cases / Person-years                        | 57/149632    | 64/148798        | 55/146834        | 43/146568        | 58/145650        |                |
| All cancers <sup>‡</sup>                    | 1.0          | 1.00 (0.70-1.43) | 0.76 (0.52-1.10) | 0.59 (0.40-0.88) | 0.80 (0.55-1.15) | 0.96           |
| All cancers*                                | 1.0          | 1.01 (0.70-1.44) | 0.79 (0.54-1.15) | 0.59 (0.39-0.89) | 0.82 (0.55-1.22) | 0.67           |
| Cases / Person-years                        | 48/149632    | 56/148798        | 42/146834        | 39/146568        | 53/145650        |                |
| MSI-low/MSS <sup>‡</sup>                    | 1.0          | 0.96 (0.65-1.41) | 0.69 (0.45-1.04) | 0.63 (0.42-0.97) | 0.87 (0.59-1.28) | 0.83           |

|                              |            |                  |                  |                  |                  |      |
|------------------------------|------------|------------------|------------------|------------------|------------------|------|
| MSI-low/MSS*                 | 1.0        | 0.96 (0.65-1.41) | 0.72 (0.47-1.09) | 0.64 (0.41-0.99) | 0.89 (0.58-1.36) | 0.56 |
| Cases / Person-years         | 9/149632   | 8/148798         | 13/146834        | 4/146568         | 5/145650         |      |
| MSI-high <sup>‡</sup>        | 1.0        | 0.79 (0.31-2.06) | 1.14 (0.49-2.67) | 0.35 (0.11-1.13) | 0.44 (0.15-1.31) | 0.67 |
| MSI-high*                    | 1.0        | 0.80 (0.31-2.07) | 1.18 (0.50-2.77) | 0.35 (0.11-1.14) | 0.45 (0.15-1.36) | 0.78 |
| <b>Both Cohorts Combined</b> |            |                  |                  |                  |                  |      |
| Cases / Person-years         | 150/518899 | 141/515313       | 127/514523       | 109/511352       | 139/506798       |      |
| All cancers <sup>‡</sup>     | 1.0        | 0.86 (0.68-1.08) | 0.69 (0.55-0.88) | 0.61 (0.47-0.78) | 0.76 (0.60-0.96) | 0.54 |
| All cancers*                 | 1.0        | 0.87 (0.69-1.09) | 0.72 (0.57-0.91) | 0.64 (0.49-0.82) | 0.83 (0.65-1.06) | 0.38 |
| Cases / Person-years         | 121/518928 | 121/515327       | 100/514550       | 94/511365        | 112/506827       |      |
| MSI-low/MSS <sup>‡</sup>     | 1.0        | 1.09 (0.85-1.41) | 0.68 (0.52-0.88) | 0.65 (0.49-0.85) | 0.76 (0.59-0.99) | 0.45 |
| MSI-low/MSS*                 | 1.0        | 1.09 (0.84-1.40) | 0.70 (0.54-0.92) | 0.68 (0.52-0.90) | 0.83 (0.63-1.08) | 0.32 |
| Cases / Person-years         | 29/519006  | 20/515409        | 27/514612        | 15/511431        | 27/506898        |      |
| MSI-high <sup>‡</sup>        | 1.0        | 0.63 (0.36-1.11) | 0.76 (0.45-1.28) | 0.43 (0.23-0.80) | 0.77 (0.45-1.29) | 0.88 |
| MSI-high*                    | 1.0        | 0.64 (0.36-1.12) | 0.79 (0.47-1.34) | 0.45 (0.24-0.85) | 0.84 (0.49-1.42) | 0.96 |

| <b>Vitamin B<sub>12</sub> (g)</b>           | <b>Q1</b>   | <b>Q2</b>        | <b>Q3</b>        | <b>Q4</b>        | <b>Q5</b>        | <b>P Trend</b> |
|---------------------------------------------|-------------|------------------|------------------|------------------|------------------|----------------|
| <b>Nurses' Health Study</b>                 |             |                  |                  |                  |                  |                |
| <b>Vitamin B<sub>12</sub>, range (g)</b>    | <b>≤4.0</b> | <b>4.1-5.0</b>   | <b>5.1-7.0</b>   | <b>7.1-11.0</b>  | <b>≥11.1</b>     |                |
| Cases / Person-years                        | 75/374299   | 89/373459        | 62/373486        | 80/371351        | 83/369329        |                |
| All cancers <sup>‡</sup>                    | 1.0         | 1.13 (0.83-1.54) | 0.76 (0.54-1.06) | 0.96 (0.70-1.32) | 0.93 (0.68-1.27) | 0.76           |
| All cancers*                                | 1.0         | 1.13 (0.83-1.54) | 0.76 (0.54-1.06) | 0.99 (0.72-1.36) | 0.95 (0.69-1.31) | 0.97           |
| Cases / Person-years                        | 59/374314   | 69/373475        | 55/373493        | 60/371371        | 67/369345        |                |
| MSI-low/MSS <sup>‡</sup>                    | 1.0         | 0.90 (0.63-1.27) | 0.86 (0.59-1.23) | 0.92 (0.64-1.32) | 0.96 (0.67-1.36) | 0.66           |
| MSI-low/MSS*                                | 1.0         | 0.90 (0.64-1.28) | 0.85 (0.59-1.23) | 0.94 (0.65-1.35) | 0.98 (0.69-1.40) | 0.84           |
| Cases / Person-years                        | 16/374349   | 20/373514        | 7/373534         | 20/371396        | 16/369385        |                |
| MSI-high <sup>‡</sup>                       | 1.0         | 1.19 (0.62-2.30) | 0.40 (0.17-0.97) | 1.13 (0.58-2.18) | 0.84 (0.42-1.68) | 0.86           |
| MSI-high*                                   | 1.0         | 1.19 (0.62-2.29) | 0.40 (0.16-0.97) | 1.15 (0.60-2.23) | 0.86 (0.43-1.73) | 0.75           |
| <b>Health Professionals Follow-up Study</b> |             |                  |                  |                  |                  |                |
| <b>Vitamin B<sub>12</sub>, range (g)</b>    | <b>≤6.0</b> | <b>6.1-8.0</b>   | <b>8.1-11.0</b>  | <b>11.1-16.0</b> | <b>≥16.1</b>     |                |
| Cases / Person-years                        | 66/148858   | 42/148915        | 66/147747        | 50/146008        | 53/145954        |                |
| All cancers <sup>‡</sup>                    | 1.0         | 0.64 (0.43-0.94) | 0.96 (0.68-1.35) | 0.67 (0.46-0.97) | 0.73 (0.51-1.04) | 0.14           |

|                              |            |                  |                  |                  |                  |      |
|------------------------------|------------|------------------|------------------|------------------|------------------|------|
| All cancers*                 | 1.0        | 0.58 (0.39-0.86) | 0.88 (0.62-1.24) | 0.61 (0.41-0.89) | 0.66 (0.45-0.97) | 0.73 |
| Cases / Person-years         | 56/148858  | 38/148915        | 56/147747        | 43/146008        | 45/145954        |      |
| MSI-low/MSS <sup>‡</sup>     | 1.0        | 1.48 (0.98-2.23) | 0.96 (0.66-1.39) | 0.68 (0.46-1.01) | 0.73 (0.49-1.07) | 0.89 |
| MSI-low/MSS*                 | 1.0        | 1.62 (1.07-2.46) | 0.88 (0.60-1.28) | 0.61 (0.41-0.93) | 0.66 (0.44-1.00) | 0.92 |
| Cases / Person-years         | 10/148858  | 4/148915         | 10/147747        | 7/146008         | 8/145954         |      |
| MSI-high <sup>‡</sup>        | 1.0        | 0.40 (0.13-1.27) | 0.96 (0.40-2.31) | 0.62 (0.24-1.62) | 0.72 (0.29-1.84) | 0.33 |
| MSI-high*                    | 1.0        | 0.36 (0.11-1.16) | 0.88 (0.36-2.12) | 0.56 (0.21-1.48) | 0.66 (0.26-1.69) | 0.32 |
| <b>Both Cohorts Combined</b> |            |                  |                  |                  |                  |      |
| Cases / Person-years         | 141/516644 | 131/516089       | 128/514978       | 130/510810       | 136/508365       |      |
| All cancers <sup>‡</sup>     | 1.0        | 0.90 (0.71-1.14) | 0.85 (0.67-1.08) | 0.82 (0.65-1.05) | 0.83 (0.66-1.05) | 0.75 |
| All cancers*                 | 1.0        | 0.88 (0.69-1.11) | 0.83 (0.65-1.05) | 0.82 (0.65-1.05) | 0.83 (0.65-1.06) | 0.81 |
| Cases / Person-years         | 115/516669 | 107/516109       | 111/514996       | 103/510836       | 112/508387       |      |
| MSI-low/MSS <sup>‡</sup>     | 1.0        | 1.11 (0.85-1.44) | 0.90 (0.69-1.17) | 0.80 (0.61-1.04) | 0.84 (0.65-1.09) | 0.85 |
| MSI-low/MSS*                 | 1.0        | 1.14 (0.88-1.49) | 0.88 (0.68-1.14) | 0.80 (0.61-1.05) | 0.84 (0.64-1.09) | 0.90 |
| Cases / Person-years         | 26/516746  | 24/516186        | 17/515070        | 27/510895        | 24/508459        |      |
| MSI-high <sup>‡</sup>        | 1.0        | 0.90 (0.51-1.56) | 0.61 (0.33-1.12) | 0.93 (0.54-1.59) | 0.80 (0.46-1.39) | 0.72 |
| MSI-high*                    | 1.0        | 0.87 (0.50-1.51) | 0.59 (0.32-1.10) | 0.93 (0.54-1.59) | 0.80 (0.46-1.39) | 0.73 |

| <b>Alcohol (g)</b>                          | <b>No alcohol</b> | <b>&lt;5 g/day</b> | <b>5-14.9 g/day</b> | <b>≥15 g/day</b> | <b>P Trend</b> |
|---------------------------------------------|-------------------|--------------------|---------------------|------------------|----------------|
| <b>Nurses' Health Study</b>                 |                   |                    |                     |                  |                |
| Cases / Person-years                        | 113/595227        | 145/629277         | 82/416136           | 49/221284        |                |
| All cancers <sup>‡</sup>                    | 1.0               | 1.28 (1.00-1.64)   | 1.04 (0.78-1.38)    | 1.12 (0.80-1.57) | 0.99           |
| All cancers*                                | 1.0               | 1.32 (1.03-1.70)   | 1.09 (0.81-1.46)    | 1.14 (0.80-1.61) | 0.91           |
| Cases / Person-years                        | 85/595253         | 122/629298         | 65/416152           | 38/221295        |                |
| MSI-low/MSS <sup>‡</sup>                    | 1.0               | 0.70 (0.53-0.92)   | 1.10 (0.79-1.51)    | 1.16 (0.79-1.70) | 0.58           |
| MSI-low/MSS*                                | 1.0               | 0.68 (0.51-0.89)   | 1.15 (0.82-1.59)    | 1.17 (0.79-1.73) | 0.52           |
| Cases / Person-years                        | 28/595293         | 23/629378          | 17/416190           | 11/221316        |                |
| MSI-high <sup>‡</sup>                       | 1.0               | 0.82 (0.47-1.42)   | 0.87 (0.48-1.58)    | 1.01 (0.51-2.04) | 0.26           |
| MSI-high*                                   | 1.0               | 0.85 (0.49-1.47)   | 0.91 (0.49-1.66)    | 1.03 (0.51-2.08) | 0.30           |
| <b>Health Professionals Follow-up Study</b> |                   |                    |                     |                  |                |
| Cases / Person-years                        | 60/172697         | 43/179417          | 78/201738           | 96/183630        |                |

|                              |            |                  |                  |                  |        |
|------------------------------|------------|------------------|------------------|------------------|--------|
| All cancers <sup>‡</sup>     | 1.0        | 0.73 (0.49-1.08) | 1.16 (0.83-1.62) | 1.49 (1.08-2.06) | 0.001  |
| All cancers <sup>*</sup>     | 1.0        | 0.72 (0.49-1.07) | 1.13 (0.80-1.59) | 1.44 (1.03-2.01) | 0.01   |
| Cases / Person-years         | 51/172697  | 34/179417        | 67/201738        | 86/183630        |        |
| MSI-low/MSS <sup>‡</sup>     | 1.0        | 1.48 (0.96-2.28) | 1.17 (0.81-1.69) | 1.57 (1.11-2.22) | 0.0004 |
| MSI-low/MSS <sup>*</sup>     | 1.0        | 1.48 (0.96-2.29) | 1.14 (0.79-1.65) | 1.52 (1.06-2.17) | 0.002  |
| Cases / Person-years         | 9/172697   | 9/179417         | 11/201738        | 10/183630        |        |
| MSI-high <sup>‡</sup>        | 1.0        | 1.01 (0.40-2.55) | 1.08 (0.45-2.60) | 1.03 (0.42-2.53) | 0.89   |
| MSI-high <sup>*</sup>        | 1.0        | 1.00 (0.40-2.53) | 1.04 (0.43-2.53) | 0.99 (0.40-2.43) | 0.78   |
| <b>Both Cohorts Combined</b> |            |                  |                  |                  |        |
| Cases / Person-years         | 173/759596 | 188/801010       | 160/609377       | 145/396902       |        |
| All cancers <sup>‡</sup>     | 1.0        | 1.09 (0.89-1.34) | 1.11 (0.90-1.38) | 1.40 (1.12-1.74) | 0.004  |
| All cancers <sup>*</sup>     | 1.0        | 1.11 (0.90-1.37) | 1.12 (0.90-1.40) | 1.34 (1.06-1.69) | 0.05   |
| Cases / Person-years         | 136/759631 | 156/801042       | 132/609402       | 124/396921       |        |
| MSI-low/MSS <sup>‡</sup>     | 1.0        | 0.87 (0.69-1.09) | 1.17 (0.92-1.49) | 1.52 (1.19-1.94) | 0.003  |
| MSI-low/MSS <sup>*</sup>     | 1.0        | 0.85 (0.68-1.08) | 1.18 (0.92-1.51) | 1.46 (1.13-1.88) | 0.03   |
| Cases / Person-years         | 37/759710  | 32/801143        | 28/609493        | 21/397009        |        |
| MSI-high <sup>‡</sup>        | 1.0        | 0.87 (0.54-1.39) | 0.90 (0.55-1.48) | 0.93 (0.55-1.59) | 0.69   |
| MSI-high <sup>*</sup>        | 1.0        | 0.88 (0.55-1.41) | 0.91 (0.55-1.49) | 0.89 (0.52-1.53) | 0.94   |

<sup>‡</sup> Age-adjusted only.

<sup>\*</sup> All models are adjusted for age (continuous), energy intake, gender, screening sigmoidoscopy, family history of colorectal cancer, aspirin use, smoking, physical activity in METs, baseline body mass index, a history of colon polyps, beef intake, calcium, multi-vitamin use, and baseline folate, vitamin B6, B12, methionine, and alcohol if not primary exposure.

Abbreviations: MSI, microsatellite instability; MSS, microsatellite stable.

**Supplemental Table 2. Risk of colon cancer according to baseline quintiles of one-carbon nutrient intake by *KRAS* mutation status of tumor among 47,371 men and 88,691 women (NHS and HPFS separately and combined).**

| Energy-adjusted daily one-carbon nutrient intake | RR (95% CI)*                                |                  |                  |                  |                  | P <sub>trend</sub> |
|--------------------------------------------------|---------------------------------------------|------------------|------------------|------------------|------------------|--------------------|
|                                                  | Q1                                          | Q2               | Q3               | Q4               | Q5               |                    |
| <b>Folate (µg)</b>                               |                                             |                  |                  |                  |                  |                    |
|                                                  | <b>Nurses' Health Study</b>                 |                  |                  |                  |                  |                    |
| <b>Folate, range (µg)</b>                        | <b>≤190</b>                                 | <b>191-245</b>   | <b>246-318</b>   | <b>319-549</b>   | <b>≥550</b>      |                    |
| Cases / Person-years                             | 89/373965                                   | 91/373326        | 70/372683        | 68/373129        | 73/368818        |                    |
| All cancers <sup>‡</sup>                         | 1.0                                         | 0.94 (0.70-1.26) | 0.68 (0.50-0.93) | 0.65 (0.48-0.90) | 0.71 (0.52-0.97) | 0.09               |
| All cancers <sup>*</sup>                         | 1.0                                         | 0.97 (0.72-1.30) | 0.72 (0.52-0.99) | 0.71 (0.51-0.98) | 0.80 (0.58-1.11) | 0.33               |
| Cases / Person-years                             | 66/373987                                   | 64/373351        | 47/372706        | 44/373146        | 51/368837        |                    |
| <i>KRAS</i> -wildtype <sup>‡</sup>               | 1.0                                         | 1.12 (0.80-1.58) | 0.62 (0.42-0.89) | 0.57 (0.39-0.84) | 0.67 (0.47-0.97) | 0.15               |
| <i>KRAS</i> -wildtype <sup>*</sup>               | 1.0                                         | 1.09 (0.77-1.54) | 0.65 (0.45-0.95) | 0.62 (0.42-0.91) | 0.75 (0.52-1.10) | 0.39               |
| Cases / Person-years                             | 23/374019                                   | 27/373377        | 23/372716        | 24/373171        | 22/368863        |                    |
| <i>KRAS</i> -mutated <sup>‡</sup>                | 1.0                                         | 1.08 (0.62-1.88) | 0.86 (0.48-1.54) | 0.89 (0.50-1.58) | 0.83 (0.46-1.49) | 0.37               |
| <i>KRAS</i> -mutated <sup>*</sup>                | 1.0                                         | 1.11 (0.64-1.94) | 0.91 (0.51-1.63) | 0.97 (0.55-1.72) | 0.93 (0.51-1.68) | 0.61               |
|                                                  | <b>Health Professionals Follow-up Study</b> |                  |                  |                  |                  |                    |
| <b>Folate, range (µg)</b>                        | <b>≤284</b>                                 | <b>285-351</b>   | <b>352-437</b>   | <b>438-661</b>   | <b>≥662</b>      |                    |
| Cases / Person-years                             | 58/148506                                   | 57/147861        | 52/147593        | 57/147624        | 54/145970        |                    |
| All cancers <sup>‡</sup>                         | 1.0                                         | 0.90 (0.62-1.29) | 0.78 (0.54-1.14) | 0.85 (0.59-1.23) | 0.77 (0.53-1.12) | 0.06               |
| All cancers <sup>*</sup>                         | 1.0                                         | 0.89 (0.62-1.29) | 0.81 (0.55-1.18) | 0.90 (0.62-1.31) | 0.82 (0.55-1.21) | 0.15               |
| Cases / Person-years                             | 30/148506                                   | 31/147861        | 31/147593        | 37/147624        | 26/145970        |                    |
| <i>KRAS</i> -wildtype <sup>‡</sup>               | 1.0                                         | 1.06 (0.64-1.75) | 0.90 (0.55-1.49) | 1.07 (0.66-1.73) | 0.72 (0.42-1.21) | 0.17               |
| <i>KRAS</i> -wildtype <sup>*</sup>               | 1.0                                         | 1.06 (0.64-1.76) | 0.93 (0.56-1.54) | 1.13 (0.69-1.84) | 0.76 (0.44-1.31) | 0.29               |
| Cases / Person-years                             | 28/148506                                   | 26/147861        | 21/147593        | 20/147624        | 28/145970        |                    |
| <i>KRAS</i> -mutated <sup>‡</sup>                | 1.0                                         | 0.85 (0.50-1.45) | 0.66 (0.37-1.16) | 0.62 (0.35-1.10) | 0.83 (0.49-1.40) | 0.19               |
| <i>KRAS</i> -mutated <sup>*</sup>                | 1.0                                         | 0.84 (0.49-1.44) | 0.68 (0.38-1.19) | 0.65 (0.37-1.17) | 0.87 (0.51-1.50) | 0.29               |
|                                                  | <b>Both Cohorts Combined</b>                |                  |                  |                  |                  |                    |
| Cases / Person-years                             | 147/515785                                  | 158/514712       | 122/513800       | 125/514484       | 127/508166       |                    |

|                                    |           |                  |                  |                  |                  |      |
|------------------------------------|-----------|------------------|------------------|------------------|------------------|------|
| All cancers <sup>‡</sup>           | 1.0       | 0.92 (0.73-1.16) | 0.72 (0.57-0.91) | 0.73 (0.58-0.93) | 0.74 (0.58-0.93) | 0.04 |
| All cancers <sup>*</sup>           | 1.0       | 0.94 (0.74-1.18) | 0.75 (0.59-0.96) | 0.78 (0.61-1.00) | 0.80 (0.62-1.03) | 0.09 |
| Cases / Person-years               | 96/515833 | 95/514761        | 781/513840       | 81/514523        | 77/508207        |      |
| <i>KRAS</i> -wildtype <sup>‡</sup> | 1.0       | 1.10 (0.83-1.47) | 0.70 (0.52-0.95) | 0.73 (0.54-0.98) | 0.68 (0.51-0.92) | 0.04 |
| <i>KRAS</i> -wildtype <sup>*</sup> | 1.0       | 1.09 (0.82-1.45) | 0.73 (0.54-0.99) | 0.78 (0.58-1.05) | 0.75 (0.55-1.02) | 0.08 |
| Cases / Person-years               | 51/515866 | 53/514791        | 44/513861        | 44/514562        | 50/508235        |      |
| <i>KRAS</i> -mutated <sup>‡</sup>  | 1.0       | 0.95 (0.65-1.40) | 0.75 (0.50-1.12) | 0.74 (0.50-1.11) | 0.83 (0.56-1.23) | 0.46 |
| <i>KRAS</i> -mutated <sup>*</sup>  | 1.0       | 0.97 (0.66-1.42) | 0.78 (0.52-1.17) | 0.79 (0.53-1.19) | 0.91 (0.61-1.35) | 0.60 |

| <b>Methionine (g)</b>                       | <b>Q1</b>    | <b>Q2</b>        | <b>Q3</b>        | <b>Q4</b>        | <b>Q5</b>        |      |
|---------------------------------------------|--------------|------------------|------------------|------------------|------------------|------|
| <b>Nurses' Health Study</b>                 |              |                  |                  |                  |                  |      |
| <b>Methionine, range (g)</b>                | <b>≤1.50</b> | <b>1.51-1.70</b> | <b>1.71-1.90</b> | <b>1.91-2.20</b> | <b>≥2.21</b>     |      |
| Cases / Person-years                        | 82/371361    | 91/371700        | 65/375393        | 63/372420        | 90/371047        |      |
| All cancers <sup>‡</sup>                    | 1.0          | 1.10 (0.81-1.48) | 0.76 (0.55-1.05) | 0.72 (0.52-1.00) | 0.97 (0.72-1.31) | 0.80 |
| All cancers <sup>*</sup>                    | 1.0          | 1.08 (0.80-1.45) | 0.73 (0.52-1.02) | 0.70 (0.50-0.98) | 0.95 (0.70-1.29) | 0.78 |
| Cases / Person-years                        | 58/371380    | 66/371722        | 39/375420        | 45/372437        | 64/371068        |      |
| <i>KRAS</i> -wildtype <sup>‡</sup>          | 1.0          | 0.89 (0.63-1.27) | 0.64 (0.43-0.96) | 0.73 (0.49-1.08) | 0.97 (0.68-1.39) | 0.84 |
| <i>KRAS</i> -wildtype <sup>*</sup>          | 1.0          | 0.91 (0.64-1.29) | 0.62 (0.41-0.93) | 0.71 (0.47-1.05) | 0.95 (0.66-1.37) | 0.81 |
| Cases / Person-years                        | 24/371413    | 25/371759        | 26/375420        | 18/372455        | 26/371099        |      |
| <i>KRAS</i> -mutated <sup>‡</sup>           | 1.0          | 1.03 (0.59-1.80) | 1.03 (0.59-1.80) | 0.70 (0.38-1.30) | 0.96 (0.55-1.67) | 0.88 |
| <i>KRAS</i> -mutated <sup>*</sup>           | 1.0          | 1.01 (0.58-1.77) | 1.00 (0.57-1.74) | 0.68 (0.37-1.26) | 0.94 (0.54-1.64) | 0.87 |
| <b>Health Professionals Follow-up Study</b> |              |                  |                  |                  |                  |      |
| <b>Methionine, range (g)</b>                | <b>≤1.81</b> | <b>1.82-2.04</b> | <b>2.05-2.26</b> | <b>2.27-2.54</b> | <b>≥2.55</b>     |      |
| Cases / Person-years                        | 67/146855    | 56/147814        | 44/149252        | 69/147417        | 42/146217        |      |
| All cancers <sup>‡</sup>                    | 1.0          | 0.85 (0.59-1.20) | 0.66 (0.45-0.96) | 1.02 (0.73-1.42) | 0.58 (0.39-0.85) | 0.02 |
| All cancers <sup>*</sup>                    | 1.0          | 0.82 (0.57-1.17) | 0.64 (0.43-0.93) | 1.01 (0.71-1.42) | 0.61 (0.41-0.90) | 0.05 |
| Cases / Person-years                        | 37/146855    | 33/147814        | 20/149252        | 36/147417        | 29/146217        |      |
| <i>KRAS</i> -wildtype <sup>‡</sup>          | 1.0          | 1.11 (0.70-1.78) | 0.54 (0.31-0.93) | 0.96 (0.61-1.52) | 0.72 (0.45-1.18) | 0.33 |
| <i>KRAS</i> -wildtype <sup>*</sup>          | 1.0          | 1.15 (0.72-1.84) | 0.52 (0.30-0.90) | 0.95 (0.60-1.52) | 0.76 (0.46-1.24) | 0.44 |
| Cases / Person-years                        | 30/146855    | 23/147814        | 24/149252        | 33/147417        | 13/146217        |      |
| <i>KRAS</i> -mutated <sup>‡</sup>           | 1.0          | 0.78 (0.45-1.34) | 0.80 (0.47-1.37) | 1.09 (0.66-1.78) | 0.40 (0.21-0.77) | 0.02 |



|                                             |              |                  |                  |                  |                  |      |
|---------------------------------------------|--------------|------------------|------------------|------------------|------------------|------|
| <i>KRAS</i> -mutated*                       | 1.0          | 0.75 (0.44-1.30) | 0.78 (0.45-1.33) | 1.08 (0.65-1.78) | 0.42 (0.22-0.81) | 0.03 |
| <b>Both Cohorts Combined</b>                |              |                  |                  |                  |                  |      |
| Cases / Person-years                        | 149/511899   | 147/513315       | 109/518360       | 132/513177       | 132/510196       |      |
| All cancers <sup>‡</sup>                    | 1.0          | 0.98 (0.78-1.24) | 0.71 (0.56-0.91) | 0.85 (0.67-1.07) | 0.80 (0.63-1.01) | 0.31 |
| All cancers*                                | 1.0          | 0.96 (0.77-1.21) | 0.69 (0.54-0.89) | 0.84 (0.66-1.06) | 0.80 (0.63-1.02) | 0.14 |
| Cases / Person-years                        | 95/511945    | 99/513361        | 59/518905        | 81/513222        | 93/510231        |      |
| <i>KRAS</i> -wildtype <sup>‡</sup>          | 1.0          | 0.96 (0.73-1.28) | 0.61 (0.44-0.84) | 0.82 (0.61-1.10) | 0.88 (0.66-1.17) | 0.36 |
| <i>KRAS</i> -wildtype*                      | 1.0          | 0.98 (0.74-1.30) | 0.59 (0.42-0.82) | 0.80 (0.60-1.09) | 0.88 (0.66-1.18) | 0.19 |
| Cases / Person-years                        | 54/511988    | 48/513404        | 50/518403        | 51/513246        | 39/510274        |      |
| <i>KRAS</i> -mutated <sup>‡</sup>           | 1.0          | 0.89 (0.60-1.31) | 0.90 (0.61-1.32) | 0.91 (0.62-1.33) | 0.65 (0.43-0.98) | 0.63 |
| <i>KRAS</i> -mutated*                       | 1.0          | 0.87 (0.59-1.28) | 0.88 (0.60-1.29) | 0.89 (0.61-1.31) | 0.65 (0.43-0.99) | 0.42 |
| <b>Vitamin B<sub>6</sub> (mg)</b>           |              |                  |                  |                  |                  |      |
|                                             | <b>Q1</b>    | <b>Q2</b>        | <b>Q3</b>        | <b>Q4</b>        | <b>Q5</b>        |      |
| <b>Nurses' Health Study</b>                 |              |                  |                  |                  |                  |      |
| <b>Vitamin B<sub>6</sub>, range (mg)</b>    | <b>≤1.30</b> | <b>1.31-1.60</b> | <b>1.61-2.00</b> | <b>2.01-3.50</b> | <b>≥3.51</b>     |      |
| Cases / Person-years                        | 93/375527    | 77/372932        | 72/374307        | 68/371263        | 81/367893        |      |
| All cancers <sup>‡</sup>                    | 1.0          | 0.77 (0.57-1.04) | 0.65 (0.48-0.89) | 0.64 (0.47-0.87) | 0.74 (0.55-1.00) | 0.51 |
| All cancers*                                | 1.0          | 0.77 (0.57-1.04) | 0.67 (0.49-0.92) | 0.68 (0.49-0.94) | 0.83 (0.60-1.13) | 0.34 |
| Cases / Person-years                        | 68/375551    | 54/372951        | 46/374333        | 43/371280        | 61/367912        |      |
| <i>KRAS</i> -wildtype <sup>‡</sup>          | 1.0          | 1.36 (0.95-1.94) | 0.57 (0.39-0.83) | 0.55 (0.38-0.81) | 0.76 (0.54-1.08) | 0.25 |
| <i>KRAS</i> -wildtype*                      | 1.0          | 1.35 (0.95-1.94) | 0.59 (0.40-0.86) | 0.59 (0.40-0.87) | 0.85 (0.59-1.22) | 0.16 |
| Cases / Person-years                        | 25/375586    | 23/372967        | 26/374347        | 25/371301        | 20/367945        |      |
| <i>KRAS</i> -mutated <sup>‡</sup>           | 1.0          | 0.85 (0.48-1.50) | 0.88 (0.51-1.52) | 0.87 (0.50-1.52) | 0.68 (0.38-1.23) | 0.38 |
| <i>KRAS</i> -mutated*                       | 1.0          | 0.86 (0.49-1.51) | 0.90 (0.52-1.57) | 0.93 (0.53-1.63) | 0.76 (0.42-1.37) | 0.49 |
| <b>Health Professionals Follow-up Study</b> |              |                  |                  |                  |                  |      |
| <b>Vitamin B<sub>6</sub>, range (mg)</b>    | <b>≤1.90</b> | <b>1.91-2.30</b> | <b>2.31-3.10</b> | <b>3.11-5.80</b> | <b>≥5.81</b>     |      |
| Cases / Person-years                        | 56/149632    | 65/148850        | 55/147834        | 43/146568        | 59/145671        |      |
| All cancers <sup>‡</sup>                    | 1.0          | 1.03 (0.72-1.48) | 0.77 (0.53-1.12) | 0.60 (0.40-0.89) | 0.83 (0.57-1.19) | 0.97 |
| All cancers*                                | 1.0          | 1.04 (0.72-1.49) | 0.80 (0.55-1.16) | 0.60 (0.39-0.91) | 0.84 (0.57-1.26) | 0.68 |
| Cases / Person-years                        | 26/149632    | 35/148850        | 38/147834        | 21/146568        | 35/145671        |      |
| <i>KRAS</i> -wildtype <sup>‡</sup>          | 1.0          | 0.84 (0.50-1.39) | 1.15 (0.70-1.89) | 0.63 (0.35-1.12) | 1.05 (0.63-1.75) | 0.28 |

|                                    |            |                  |                  |                  |                  |      |
|------------------------------------|------------|------------------|------------------|------------------|------------------|------|
| <i>KRAS</i> -wildtype*             | 1.0        | 0.83 (0.50-1.38) | 1.19 (0.72-1.96) | 0.63 (0.35-1.14) | 1.08 (0.63-1.83) | 0.16 |
| Cases / Person-years               | 30/149632  | 30/148850        | 17/147834        | 22/146568        | 24/145671        |      |
| <i>KRAS</i> -mutated <sup>‡</sup>  | 1.0        | 0.89 (0.54-1.48) | 0.45 (0.25-0.81) | 0.57 (0.33-0.99) | 0.63 (0.37-1.08) | 0.25 |
| <i>KRAS</i> -mutated*              | 1.0        | 0.90 (0.54-1.49) | 0.46 (0.25-0.84) | 0.57 (0.32-1.00) | 0.64 (0.37-1.12) | 0.33 |
| <b>Both Cohorts Combined</b>       |            |                  |                  |                  |                  |      |
| Cases / Person-years               | 149/518900 | 142/515357       | 127/514523       | 111/511350       | 140/506817       |      |
| All cancers <sup>‡</sup>           | 1.0        | 0.87 (0.69-1.10) | 0.70 (0.55-0.88) | 0.62 (0.48-0.79) | 0.77 (0.61-0.97) | 0.54 |
| All cancers*                       | 1.0        | 0.88 (0.70-1.10) | 0.72 (0.57-0.92) | 0.65 (0.51-0.84) | 0.84 (0.66-1.07) | 0.40 |
| Cases / Person-years               | 94/518953  | 89/515401        | 84/514565        | 84/511386        | 96/506858        |      |
| <i>KRAS</i> -wildtype <sup>‡</sup> | 1.0        | 1.16 (0.87-1.55) | 0.73 (0.54-0.98) | 0.57 (0.41-0.78) | 0.84 (0.63-1.12) | 0.15 |
| <i>KRAS</i> -wildtype*             | 1.0        | 1.15 (0.86-1.54) | 0.76 (0.56-1.02) | 0.60 (0.43-0.82) | 0.91 (0.68-1.23) | 0.09 |
| Cases / Person-years               | 55/518981  | 53/515423        | 43/514597        | 47/511408        | 44/506906        |      |
| <i>KRAS</i> -mutated <sup>‡</sup>  | 1.0        | 0.88 (0.60-1.28) | 0.64 (0.43-0.95) | 0.71 (0.48-1.05) | 0.66 (0.44-0.98) | 0.42 |
| <i>KRAS</i> -mutated*              | 1.0        | 0.89 (0.61-1.29) | 0.66 (0.44-0.99) | 0.75 (0.50-1.11) | 0.71 (0.48-1.07) | 0.47 |

| <b>Vitamin B<sub>12</sub> (g)</b>           | <b>Q1</b>   | <b>Q2</b>        | <b>Q3</b>        | <b>Q4</b>        | <b>Q5</b>        |      |
|---------------------------------------------|-------------|------------------|------------------|------------------|------------------|------|
| <b>Nurses' Health Study</b>                 |             |                  |                  |                  |                  |      |
| <b>Vitamin B<sub>12</sub>, range (g)</b>    | <b>≤4.0</b> | <b>4.1-5.0</b>   | <b>5.1-7.0</b>   | <b>7.1-11.0</b>  | <b>≥11.1</b>     |      |
| Cases / Person-years                        | 75/374299   | 89/373459        | 62/373486        | 80/371351        | 85/369327        |      |
| All cancers <sup>‡</sup>                    | 1.0         | 1.13 (0.83-1.54) | 0.76 (0.54-1.06) | 0.96 (0.70-1.32) | 0.96 (0.70-1.30) | 0.76 |
| All cancers*                                | 1.0         | 1.13 (0.83-1.54) | 0.76 (0.54-1.06) | 0.99 (0.72-1.36) | 0.98 (0.71-1.34) | 0.97 |
| Cases / Person-years                        | 55/374314   | 61/373484        | 42/373507        | 57/371369        | 57/369353        |      |
| <i>KRAS</i> -wildtype <sup>‡</sup>          | 1.0         | 0.95 (0.66-1.36) | 0.70 (0.47-1.05) | 0.94 (0.65-1.36) | 0.87 (0.60-1.27) | 0.94 |
| <i>KRAS</i> -wildtype*                      | 1.0         | 0.95 (0.66-1.37) | 0.70 (0.47-1.05) | 0.96 (0.66-1.40) | 0.90 (0.62-1.30) | 0.88 |
| Cases / Person-years                        | 20/374349   | 28/373505        | 20/373520        | 23/371398        | 28/369375        |      |
| <i>KRAS</i> -mutated <sup>‡</sup>           | 1.0         | 1.33 (0.75-2.37) | 0.91 (0.49-1.70) | 1.04 (0.57-1.89) | 1.18 (0.66-2.09) | 0.62 |
| <i>KRAS</i> -mutated*                       | 1.0         | 1.33 (0.75-2.36) | 0.91 (0.49-1.70) | 1.06 (0.58-1.94) | 1.21 (0.68-2.15) | 0.75 |
| <b>Health Professionals Follow-up Study</b> |             |                  |                  |                  |                  |      |
| <b>Vitamin B<sub>12</sub>, range (g)</b>    | <b>≤6.0</b> | <b>6.1-8.0</b>   | <b>8.1-11.0</b>  | <b>11.1-16.0</b> | <b>≥16.1</b>     |      |
| Cases / Person-years                        | 66/148898   | 42/148915        | 65/147747        | 51/146020        | 54/145974        |      |
| All cancers <sup>‡</sup>                    | 1.0         | 0.64 (0.43-0.94) | 0.95 (0.67-1.33) | 0.68 (0.47-0.98) | 0.74 (0.52-1.06) | 0.74 |

|                                    |            |                  |                  |                  |                  |      |
|------------------------------------|------------|------------------|------------------|------------------|------------------|------|
| All cancers*                       | 1.0        | 0.58 (0.39-0.85) | 0.86 (0.61-1.22) | 0.62 (0.42-0.90) | 0.67 (0.46-0.98) | 0.76 |
| Cases / Person-years               | 36/148898  | 22/148915        | 37/147747        | 27/146020        | 33/145974        |      |
| <i>KRAS</i> -wildtype <sup>‡</sup> | 1.0        | 1.64 (0.96-2.78) | 0.99 (0.63-1.57) | 0.66 (0.40-1.09) | 0.83 (0.52-1.33) | 0.94 |
| <i>KRAS</i> -wildtype*             | 1.0        | 1.80 (1.06-3.07) | 0.90 (0.57-1.43) | 0.60 (0.36-1.00) | 0.76 (0.47-1.23) | 0.96 |
| Cases / Person-years               | 30/148898  | 20/148915        | 28/147747        | 24/146020        | 21/145974        |      |
| <i>KRAS</i> -mutated <sup>‡</sup>  | 1.0        | 0.67 (0.38-1.17) | 0.90 (0.54-1.50) | 0.70 (0.41-1.20) | 0.63 (0.36-1.10) | 0.64 |
| <i>KRAS</i> -mutated*              | 1.0        | 0.60 (0.34-1.06) | 0.81 (0.48-1.37) | 0.63 (0.37-1.10) | 0.57 (0.33-1.01) | 0.63 |
| <b>Both Cohorts Combined</b>       |            |                  |                  |                  |                  |      |
| Cases / Person-years               | 141/516678 | 131/516089       | 127/514980       | 131/510819       | 139/508381       |      |
| All cancers <sup>‡</sup>           | 1.0        | 0.90 (0.71-1.14) | 0.84 (0.66-1.07) | 0.83 (0.65-1.05) | 0.85 (0.67-1.08) | 0.77 |
| All cancers*                       | 1.0        | 0.87 (0.69-1.11) | 0.82 (0.64-1.04) | 0.83 (0.65-1.06) | 0.85 (0.67-1.08) | 0.82 |
| Cases / Person-years               | 91/516722  | 83/516134        | 79/515024        | 84/510856        | 90/508427        |      |
| <i>KRAS</i> -wildtype <sup>‡</sup> | 1.0        | 1.13 (0.84-1.52) | 0.81 (0.60-1.10) | 0.83 (0.61-1.11) | 0.85 (0.64-1.14) | 0.87 |
| <i>KRAS</i> -wildtype*             | 1.0        | 1.16 (0.86-1.57) | 0.79 (0.58-1.07) | 0.82 (0.61-1.11) | 0.85 (0.63-1.14) | 0.91 |
| Cases / Person-years               | 50/516761  | 48/516160        | 48/515044        | 47/510894        | 49/508455        |      |
| <i>KRAS</i> -mutated <sup>‡</sup>  | 1.0        | 0.93 (0.63-1.38) | 0.89 (0.60-1.33) | 0.84 (0.56-1.25) | 0.85 (0.57-1.25) | 0.80 |
| <i>KRAS</i> -mutated*              | 1.0        | 0.90 (0.61-1.34) | 0.87 (0.58-1.30) | 0.84 (0.56-1.25) | 0.84 (0.57-1.25) | 0.82 |

| Alcohol (g)                                 | No alcohol | <5 g/day         | 5-14.9 g/day     | ≥15 g/day        | P Trend |
|---------------------------------------------|------------|------------------|------------------|------------------|---------|
| <b>Nurses' Health Study</b>                 |            |                  |                  |                  |         |
| Cases / Person-years                        | 114/595225 | 146/629277       | 82/416136        | 49/221284        |         |
| All cancers <sup>‡</sup>                    | 1.0        | 1.28 (1.00-1.64) | 1.03 (0.78-1.37) | 1.11 (0.80-1.55) | 0.97    |
| All cancers*                                | 1.0        | 1.31 (1.03-1.69) | 1.08 (0.80-1.44) | 1.13 (0.80-1.59) | 0.88    |
| Cases / Person-years                        | 81/595250  | 97/629325        | 56/416157        | 38/221295        |         |
| <i>KRAS</i> -wildtype <sup>‡</sup>          | 1.0        | 0.84 (0.62-1.12) | 0.99 (0.71-1.39) | 1.21 (0.83-1.78) | 0.43    |
| <i>KRAS</i> -wildtype*                      | 1.0        | 0.81 (0.60-1.09) | 1.03 (0.73-1.46) | 1.23 (0.83-1.83) | 0.51    |
| Cases / Person-years                        | 33/595294  | 49/629351        | 26/416184        | 11/221316        |         |
| <i>KRAS</i> -mutated <sup>‡</sup>           | 1.0        | 1.48 (0.95-2.31) | 1.13 (0.67-1.88) | 0.86 (0.44-1.70) | 0.21    |
| <i>KRAS</i> -mutated*                       | 1.0        | 1.52 (0.98-2.38) | 1.18 (0.70-1.97) | 0.87 (0.44-1.74) | 0.20    |
| <b>Health Professionals Follow-up Study</b> |            |                  |                  |                  |         |
| Cases / Person-years                        | 60/172724  | 44/179417        | 79/201763        | 95/183650        |         |

|                                    |            |                  |                  |                  |       |
|------------------------------------|------------|------------------|------------------|------------------|-------|
| All cancers <sup>‡</sup>           | 1.0        | 0.75 (0.51-1.10) | 1.17 (0.84-1.64) | 1.48 (1.07-2.04) | 0.003 |
| All cancers <sup>*</sup>           | 1.0        | 0.74 (0.50-1.10) | 1.14 (0.81-1.61) | 1.44 (1.03-2.01) | 0.01  |
| Cases / Person-years               | 29/172724  | 26/179417        | 49/201763        | 51/183650        |       |
| <i>KRAS</i> -wildtype <sup>‡</sup> | 1.0        | 1.10 (0.65-1.87) | 1.51 (0.95-2.38) | 1.64 (1.04-2.59) | 0.08  |
| <i>KRAS</i> -wildtype <sup>*</sup> | 1.0        | 1.11 (0.65-1.88) | 1.47 (0.92-2.33) | 1.60 (1.00-2.55) | 0.14  |
| Cases / Person-years               | 31/172724  | 18/179417        | 30/201763        | 44/183650        |       |
| <i>KRAS</i> -mutated <sup>‡</sup>  | 1.0        | 0.59 (0.33-1.06) | 0.86 (0.52-1.42) | 1.32 (0.83-2.09) | 0.009 |
| <i>KRAS</i> -mutated <sup>*</sup>  | 1.0        | 0.59 (0.33-1.05) | 0.84 (0.51-1.40) | 1.29 (0.81-2.06) | 0.02  |
| <b>Both Cohorts Combined</b>       |            |                  |                  |                  |       |
| Cases / Person-years               | 174/759616 | 190/801009       | 161/609398       | 144/396923       |       |
| All cancers <sup>‡</sup>           | 1.0        | 1.10 (0.89-1.35) | 1.12 (0.90-1.38) | 1.38 (1.11-1.72) | 0.01  |
| All cancers <sup>*</sup>           | 1.0        | 1.12 (0.91-1.37) | 1.12 (0.90-1.40) | 1.33 (1.05-1.67) | 0.07  |
| Cases / Person-years               | 110/759666 | 123/801078       | 105/609450       | 89/396970        |       |
| <i>KRAS</i> -wildtype <sup>‡</sup> | 1.0        | 0.89 (0.69-1.15) | 1.15 (0.88-1.51) | 1.35 (1.02-1.79) | 0.10  |
| <i>KRAS</i> -wildtype <sup>*</sup> | 1.0        | 0.88 (0.68-1.13) | 1.16 (0.89-1.52) | 1.30 (0.97-1.74) | 0.30  |
| Cases / Person-years               | 64/759717  | 67/801107        | 56/609489        | 55/397001        |       |
| <i>KRAS</i> -mutated <sup>‡</sup>  | 1.0        | 1.05 (0.75-1.48) | 1.05 (0.73-1.51) | 1.42 (0.99-2.04) | 0.03  |
| <i>KRAS</i> -mutated <sup>*</sup>  | 1.0        | 1.07 (0.76-1.51) | 1.06 (0.74-1.52) | 1.37 (0.95-1.98) | 0.08  |

<sup>‡</sup> Age-adjusted only.

<sup>\*\*</sup> All models are adjusted for age (continuous), energy intake, gender, screening sigmoidoscopy, family history of colorectal cancer, aspirin use, smoking, physical activity in METs, baseline body mass index, a history of colon polyps, beef intake, calcium, multi-vitamin use, and baseline folate, vitamin B6, B12, methionine, and alcohol if not primary exposure.

*KRAS* mutation in codon 12 or 13.
